# Supplementary material for: Hedgehog inhibition mediates radiation sensitivity in mouse xenograft models of human esophageal adenocarcinoma
Source: PubMed Central journal article supplement (PMC5929523; doi:10.1371/journal.pone.0194809), 2018-05-01
Supplement: pone.0194809.s002.pdf [file pone.0194809.s002.pdf]

**Table S1:** Primer sequences used for RT-PCR

| <b>Transcript</b> | <b>Human</b>                                         | <b>Mouse</b>                                          |
|-------------------|------------------------------------------------------|-------------------------------------------------------|
| SHH               | F: cagaggagtctctgcactacga<br>R: cgtagtacaccagtcgaagc | F: cactatgagggtcgagcagtg<br>R: gtggatgtgagctttggatc   |
| IHH               | F: acaaagcatgggacactggg<br>R: catgccaagctgtgaaagagt  | F: gcattgctctgtcaagtctga<br>R: tctcctggctttacagctgac  |
| PTCH1             | F: caccgacacacacgacaatac<br>R: gcatggtaatctgcgtttcat | F: ctgctgggtgtactgatgctt<br>R: agcagaaccagtcattgaga   |
| PTCH2             | F: tcttctacatggggctgacc<br>R: gtatttgcgtgcagccattc   | F: ctccgctcaggtcattcagat<br>R: ggaggcaaaatggtgactaca  |
| GLI               | F: acacatatggacctggctttg<br>R: ctgccctatgtgaagccctat | F: tctctcattccacaggacag<br>R: ctggtatgggagttcctggtt   |
| SMO               | F: tgagtgggattgttttggg<br>R: ctctcggatgaggaagtagc    | F: agattgttgccgagcagat<br>R: ccacgaaccagactactccag    |
| ACTB              | F: ttgctatccaggctgtgctat<br>R: agggcatacccctcgtagat  | F: cgttgacatccgtaaagacctc<br>R: gtgctaggagccagagcagta |
| HSP90AB1          | F: gtcttctgtggagggtcctt<br>R: ctttgacccgcctctcttcta  | F: gaggcagacaaaaacgacaaa<br>R: tgagaaaccagaggagagcag  |
| YWHAZ             | F: aatgcttcacaagcagagagc<br>R: tgcttgtgtgactgatcgac  | F: ctgcctacatattggtgtgtg<br>R: tttgtgtcacagcctcacaag  |
