# Supplementary material for: Hedgehog inhibition mediates radiation sensitivity in mouse xenograft models of human esophageal adenocarcinoma
Source: PubMed Central journal article supplement (PMC5929523; doi:10.1371/journal.pone.0194809), 2018-05-01
Supplement: pone.0194809.s003.pdf [file pone.0194809.s003.pdf]

**S2 Table. Mathematical models used for each PDX growth curve**

| Two-slope mixed effect repeated measures                                                                                                                                                                                                                                   | Linear mixed effect repeated measures            |
|----------------------------------------------------------------------------------------------------------------------------------------------------------------------------------------------------------------------------------------------------------------------------|--------------------------------------------------|
| Model 3 passage 3 (radiation, chemorad)<br>Model 4 passage 4 (radiation)<br>Model 4 passage 5 (radiation, chemo, chemorad)<br>Model 5 passage 3 (radiation)<br>Model 6 passage 3 (chemo, chemorad)<br>Model 8 passage 3 (chemorad)<br>Model 8 passage 5 (LDE225+radiation) | All other treatment groups<br>All control groups |
