# Supplementary material for: Hedgehog inhibition mediates radiation sensitivity in mouse xenograft models of human esophageal adenocarcinoma
Source: PubMed Central journal article supplement (PMC5929523; doi:10.1371/journal.pone.0194809), 2018-05-01
Supplement: pone.0194809.s005.pdf [file pone.0194809.s005.pdf]

**S4 Table. P-values for comparison of chemoradiation growth delay relative to either modality alone.**

| <b>PDX Model</b> | <b>Passage</b> | <b>Growth Delay Comparison</b> | <b>Growth delay using <math>3V_0</math> or <math>2V_0</math></b> | <b>GD (days)</b> | <b>P-value</b> |
|------------------|----------------|--------------------------------|------------------------------------------------------------------|------------------|----------------|
| 3                | 3              | Chemorad vs. Rad               | $3V_0$                                                           | 12               | 0.819          |
|                  |                | Chemorad vs. Chemo             |                                                                  | 37               | <0.001         |
| 4                | 4              | Chemorad vs. Rad               | $3V_0$                                                           | 19               | 0.003          |
|                  |                | Chemorad vs. Chemo             |                                                                  | 17               | 0.021          |
| 4                | 5              | Chemorad vs. Rad               | $3V_0$                                                           | 6                | 0.013          |
|                  |                | Chemorad vs. Chemo             |                                                                  | 25               | <0.001         |
| 5                | 3              | Chemorad vs. Rad               | $3V_0$                                                           | 44               | 0.134          |
|                  |                | Chemorad vs. Chemo             |                                                                  | 39               | 0.194          |
| 6                | 3              | Chemorad vs. Rad               | $2V_0$                                                           | 6                | 0.079          |
|                  |                | Chemorad vs. Chemo             |                                                                  | 6                | 0.016          |
| 7                | 4              | Chemorad vs. Rad               | $3V_0$                                                           | 6                | 0.362          |
|                  |                | Chemorad vs. Chemo             |                                                                  | 17               | <0.001         |
| 8                | 3              | Chemorad vs. Rad               | $2V_0$                                                           | 10               | 0.166          |
|                  |                | Chemorad vs. Chemo             |                                                                  | 30               | <0.001         |
